# Supplementary material
Source: ML conference proceedings conference paper supplement (https://proceedings.neurips.cc/paper_files/paper/2012/hash/7c33e57e3dbd8a52940fa1a963aa4a4a-Abstract.html)
Supplement: Supplementary file 1 [file 7c33e57e3dbd8a52940fa1a963aa4a4a-Supplemental.zip]

## Appendix

**Proof of Lemma 3:** Since,  $\text{poi}(\lambda, \mu) = e^{-\lambda} \lambda^\mu / \mu!$ ,

$$\begin{aligned} \mathbb{E}_{\mu \sim \text{poi}(\lambda_1)} \left[ \frac{\text{poi}(\lambda_2, \mu)}{\text{poi}(\lambda_0, \mu)} \right] &= \sum_{\mu=0}^{\infty} \frac{\text{poi}(\lambda_1, \mu) \text{poi}(\lambda_2, \mu)}{\text{poi}(\lambda_0, \mu)} \\ &= \exp(\lambda_0 - \lambda_2 - \lambda_1) \sum_{\mu=0}^{\infty} \left( \frac{\lambda_1 \lambda_2}{\lambda_0} \right)^\mu \frac{1}{\mu!} \\ &= \exp(\lambda_0 - \lambda_1 - \lambda_2) \exp\left(\frac{\lambda_1 \lambda_2}{\lambda_0}\right) \\ &= \exp\left(\frac{(\lambda_1 - \lambda_0)(\lambda_2 - \lambda_0)}{\lambda_0}\right). \end{aligned} \quad \blacksquare$$

**Proof of Lemma 4:** Let  $Q^* = \text{argmin}_Q \max_P D(P||Q)$ , then  $Q^{*'}$  satisfies  $D(P'||Q^{*'}) \leq \bar{R}(\mathcal{P})$  for all  $P' \in \mathcal{P}$ .  $\blacksquare$

**Proof of Lemma 5:** Let  $P_1$  and  $Q_1$  be distributions achieving redundancy  $\bar{R}(\mathcal{P}_A)$  and  $\bar{R}(\mathcal{P}_B)$ . Then,

$$\begin{aligned} \bar{R}(\mathcal{P}_A) + \bar{R}(\mathcal{P}_B) &= \sup_P \left( \sum_{a \in \mathcal{A}} P(a) \log \frac{P(a)}{P_1(a)} \right) + \sup_Q \left( \sum_{b \in \mathcal{B}} Q(b) \log \frac{Q(b)}{Q_1(b)} \right) \\ &\geq \sup_{P, Q \in \mathcal{P}} \left( \sum_{a \in \mathcal{A}} P(a) \log \frac{P(a)}{P_1(a)} + \sum_{b \in \mathcal{B}} Q(b) \log \frac{Q(b)}{Q_1(b)} \right) \\ &= \sup_{P, Q \in \mathcal{P}} \left( \sum_{(a,b) \in (\mathcal{A}, \mathcal{B})} P(a) Q(b) \log \frac{P(a) Q(b)}{P_1(a) Q_1(b)} \right) \\ &= \sup_{P, Q \in \mathcal{P}} D(P \cdot Q || P_1 \cdot Q_1) \\ &\geq \bar{R}(\mathcal{P}). \end{aligned} \quad \blacksquare$$

**Proof of Lemma 7:** For  $1 \leq i \leq T$ , let the distribution  $Q_i = \text{argmin}_Q \max_{P \in \mathcal{P}_i} D(P||Q)$  achieve the redundancy bound  $\bar{R}(\mathcal{P}_i)$ , and  $Q = \frac{1}{T} \sum_{i=1}^T Q_i$ . Then for all  $i$  and all  $a \in \mathcal{A}$ ,  $Q(a) \geq Q_i(a)/T$ , and hence for any  $P \in P_1 \cup P_2 \dots \cup P_T$ ,

$$D(P||Q) = \mathbb{E}_{X \sim P} \left[ \log \frac{P(X)}{Q(X)} \right] \leq \log T + \mathbb{E}_P \left[ \log \frac{P(X)}{Q_i(X)} \right] \leq \log T + \bar{R}(\mathcal{P}_i).$$

Considering maximum over all distributions in  $\mathcal{P}$  yields the desired result.  $\blacksquare$

**Proof of Lemma 9:** As mentioned in the proof sketch, we construct the distribution  $\Lambda^*$  as follows. Pick any distribution  $\Lambda' \in \mathcal{I}_\tau$  and let  $\Lambda^* = \bigcup_{j=1}^B \Lambda_j^*$ , where  $\Lambda_j^* = \{\lambda_{j,1}^*, \dots, \lambda_{j,m_j}^*\}$  is such that

$$\lambda_{j,1}^* \stackrel{\text{def}}{=} \lambda_{j,2}^* \stackrel{\text{def}}{=} \dots \stackrel{\text{def}}{=} \lambda_{j,m_j}^* \stackrel{\text{def}}{=} \lambda_j^* \stackrel{\text{def}}{=} \frac{1}{m_j} \sum_{l=1}^{m_j} \lambda'_{j,l},$$

for  $j = 1, 2, \dots, B$ . In other words,  $\Lambda^* \in \mathcal{I}_\tau$  is obtained from an arbitrary  $\Lambda' \in \mathcal{I}_\tau$  by making all the  $m_j$  elements of  $\Lambda_j^*$  equal to  $\sum_{l=1}^{m_j} \lambda'_{j,l} / m_j$ , the average of the elements in  $\Lambda'_j$ , for  $j = 1, 2, \dots, B$ .

For any  $\Lambda \in \mathcal{I}_\tau$ , we analyze  $D(\Lambda||\Lambda^*)$ . Let  $\bar{\varphi}_j$  be the profile generated by  $\Lambda_j = \{\lambda_{j,1}, \dots, \lambda_{j,m_j}\}$ . Since  $\bar{\varphi}_{\text{med}} = \bar{\varphi}_1 \cup \dots \cup \bar{\varphi}_B = f((\bar{\varphi}_1, \bar{\varphi}_2, \dots, \bar{\varphi}_B))$ , a function of the  $B$ -tuple  $(\bar{\varphi}_1, \bar{\varphi}_2, \dots, \bar{\varphi}_B)$ . By independence of sampling,  $(\bar{\varphi}_1, \bar{\varphi}_2, \dots, \bar{\varphi}_B)$  is distributed as  $\Lambda_1 \times \dots \times \Lambda_B$ . U

$$D(\Lambda||\Lambda^*) \leq D\left(\prod_{j=1}^B \Lambda_j \parallel \prod_{j=1}^B \Lambda_j^*\right) = \sum_{j=1}^B D(\Lambda_j||\Lambda_j^*) = \sum_{j=1}^B \mathbb{E}_{\Lambda_j} \left[ \log \frac{\Lambda_j(\bar{\varphi}_j)}{\Lambda_j^*(\bar{\varphi}_j)} \right] \leq \sum_{j=1}^B \log \left( \mathbb{E}_{\Lambda_j} \left[ \frac{\Lambda_j(\bar{\varphi}_j)}{\Lambda_j^*(\bar{\varphi}_j)} \right] \right),$$

where the first inequality follows from Lemma (4), and the last from the concavity of the logarithms.

We bound each of the summands as follows. Let  $\bar{\varphi}_j = \{\mu_1, \mu_2, \dots, \mu_{m_j}\}$ , where  $\mu_j$  is generated by  $\lambda_j$ . Using Equation (5), if  $\bar{\varphi}_j = \{\mu_1, \mu_2, \dots, \mu_{m_j}\}$ , then

$$\Lambda_j(\bar{\varphi}_j) = F(\bar{\varphi}_j) \sum_{\sigma \in S_{m_j}} \prod_{l=1}^{m_j} \text{poi}(\lambda_{j,\sigma(l)}, \mu_l).$$

For  $\Lambda_j^*$ , all the summands are identical, so  $\Lambda_j^*(\bar{\varphi}_j) = F(\bar{\varphi}_j) \prod_{l=1}^{m_j} \text{poi}(\lambda_j^*, \mu_l)$ . Hence,

$$\frac{\Lambda_j(\bar{\varphi}_j)}{\Lambda_j^*(\bar{\varphi}_j)} = \frac{1}{m!} \sum_{\sigma \in S_{m_j}} \prod_{l=1}^{m_j} \frac{\text{poi}(\lambda_{j,\sigma(l)}, \mu_l)}{\text{poi}(\lambda_j^*, \mu_l)}.$$

By the linearity of expectations and the independence of  $\mu$ 's,

$$\mathbb{E}_{\Lambda_j} \left[ \frac{\Lambda_j(\bar{\varphi}_j)}{\Lambda_j^*(\bar{\varphi}_j)} \right] = \frac{1}{m!} \sum_{\sigma \in S_{m_j}} \prod_{l=1}^{m_j} \mathbb{E}_{\Lambda_j} \left[ \frac{\text{poi}(\lambda_{j,\sigma(l)}, \mu_l)}{\text{poi}(\lambda_j^*, \mu_l)} \right],$$

and since that  $\mu_j$  is distributed  $\lambda_{j,l}$ , invoking Lemma 3,

$$\begin{aligned} \mathbb{E}_{\Lambda_j} \left[ \frac{\Lambda_j(\bar{\varphi}_j)}{\Lambda_j^*(\bar{\varphi}_j)} \right] &= \frac{1}{m!} \sum_{\sigma \in S_{m_j}} \prod_{l=1}^{m_j} \mathbb{E}_{\mu_j \sim \text{poi}(\lambda_{j,l})} \left[ \frac{\text{poi}(\lambda_{j,\sigma(l)}, \mu_l)}{\text{poi}(\lambda_j^*, \mu_l)} \right] \\ &= \frac{1}{m!} \sum_{\sigma \in S_{m_j}} \exp \left( \sum_{l=1}^{m_j} \frac{(\lambda_{j,l} - \lambda_j^*)(\lambda_{j,\sigma(l)} - \lambda_j^*)}{\lambda_j^*} \right) \\ &\leq \exp \left( m_j \frac{\Delta_j^2}{\lambda_j^-} \right), \end{aligned}$$

where in the last inequality, we use  $|\lambda_j^* - \lambda_{j,l}| \leq \Delta_j$  and  $\lambda_j^* \geq \lambda_j^-$ . Combining the above inequalities, for all  $\Lambda \in \mathcal{I}_\tau$ ,

$$D(\Lambda \| \Lambda^*) \leq \sum_{j=1}^B \log \left( \mathbb{E}_{\Lambda_j} \left[ \frac{\Lambda_j(\bar{\varphi}_j)}{\Lambda_j^*(\bar{\varphi}_j)} \right] \right) \leq \sum_{j=1}^B m_j \frac{\Delta_j^2}{\lambda_j^-}.$$

So,

$$\overline{R}(\mathcal{I}_\tau) = \min_Q \max_{\Lambda \in \mathcal{I}_\tau} D(\Lambda \| Q) \leq \max_{\Lambda \in \mathcal{I}_\tau} D(\Lambda \| \Lambda^*) \leq \sum_{j=1}^B m_j \frac{\Delta_j^2}{\lambda_j^-}. \quad \blacksquare$$

**Proof of Lemma 14:** We construct a map  $f$  from the set of profiles to  $\mathcal{L}$  and then show that for any  $\Lambda \in \mathcal{L}$ , if  $\bar{\varphi} \sim \Lambda$

$$P(f(\bar{\varphi}) \neq \Lambda) < \epsilon. \quad (6)$$

Let  $\bar{\varphi} = \{\mu_1, \mu_2, \dots\}$  be a profile. For each  $j = 1, 2, \dots, K$ , let

$$x_i = \begin{cases} 1 & \text{if } \exists j \text{ such that } i = \underset{r}{\operatorname{argmin}} |\mu_j - \lambda_r^*| \\ 0 & \text{otherwise.} \end{cases}$$

In other words, for each multiplicity  $\mu_j$  we set the coordinate  $x_i$  to 1 if  $\mu_j$  is closest to  $\lambda_i^*$ . Let  $\bar{x} = x_1 \dots x_K$ . Let  $\hat{c} \in \mathcal{C}$  be the code with minimum Hamming distance from  $\bar{x}$ . Then,

$$f(\bar{\varphi}) = \Lambda_{\hat{c}}.$$

Let  $\bar{c} \in \mathcal{C}$ . We now analyze Equation 6 for  $\Lambda_{\bar{c}}$ . Two adjacent  $\lambda^*$ 's are separated by

$$\Delta_i \triangleq \lambda_{i+1}^* - \lambda_i^* = (2i+1)C > 2\sqrt{C\lambda_i^*}. \quad (7)$$

Let  $\lambda_i^* \in \Lambda_{\bar{c}}$  be any element. Let  $Y_i$  be a random variable that is 1 if the multiplicity  $\mu_i$  generated by  $\lambda_i^*$  is closest to a  $\lambda_j^*$ ,  $j \neq i$  and 0 otherwise. Using the fact that the minimum distance of the code is  $\alpha K$ , the probability of error is at most the probability that  $\sum Y_i \geq \frac{\alpha K}{2}$ . So, for  $\bar{\varphi} \sim \Lambda_{\bar{c}}$

$$P(f(\bar{\varphi}) \neq \Lambda_{\bar{c}}) \leq P\left(\sum Y_i \geq \frac{\alpha K}{2}\right).$$

Using Equation (7), an application of Chernoff bound,

$$P(Y_i = 1) \leq P\left(|\mu_i - \lambda_i^*| \geq \frac{\Delta_i}{2}\right) \leq e^{-C/4}.$$

So,

$$\mathbb{E}\left[\sum Y_i\right] \leq e^{-C/4} K.$$

By Markov's Inequality,

$$P(f(\bar{\varphi}) \neq \Lambda_{\bar{c}}) \leq \frac{2e^{-C/4}}{\alpha},$$

thus proving the result. ■
